# Supplementary material for: Design, synthesis and antibacterial evaluation of a polycationic calix[4]arene derivative alone and in combination with antibiotics
Source: Royal Society of Chemistry journal article supplement (doi:10.1039/c7md00527j), 2017-12-01
Supplement: c7md00527j1.pdf [file c7md00527j1.pdf]

## Supporting information

### Design, synthesis and antibacterial evaluation of a polycationic calix[4]arene derivative alone and in combination with antibiotics

G. M. L. Consoli, G. Granata, R. Picciotto, A. R. Blanco, C. Geraci, A. Marino and A. Nostro

#### Content:

|                                                              |   |
|--------------------------------------------------------------|---|
| Figure S1. <sup>1</sup> H NMR spectra of compound <b>2</b>   | 2 |
| Figure S2. <sup>13</sup> C NMR spectrum of compound <b>2</b> | 3 |
| Figure S3. 2D COSY-NMR spectrum of compound <b>2</b>         | 4 |
| Figure S4. HRMS spectrum of compound <b>2</b>                | 5 |

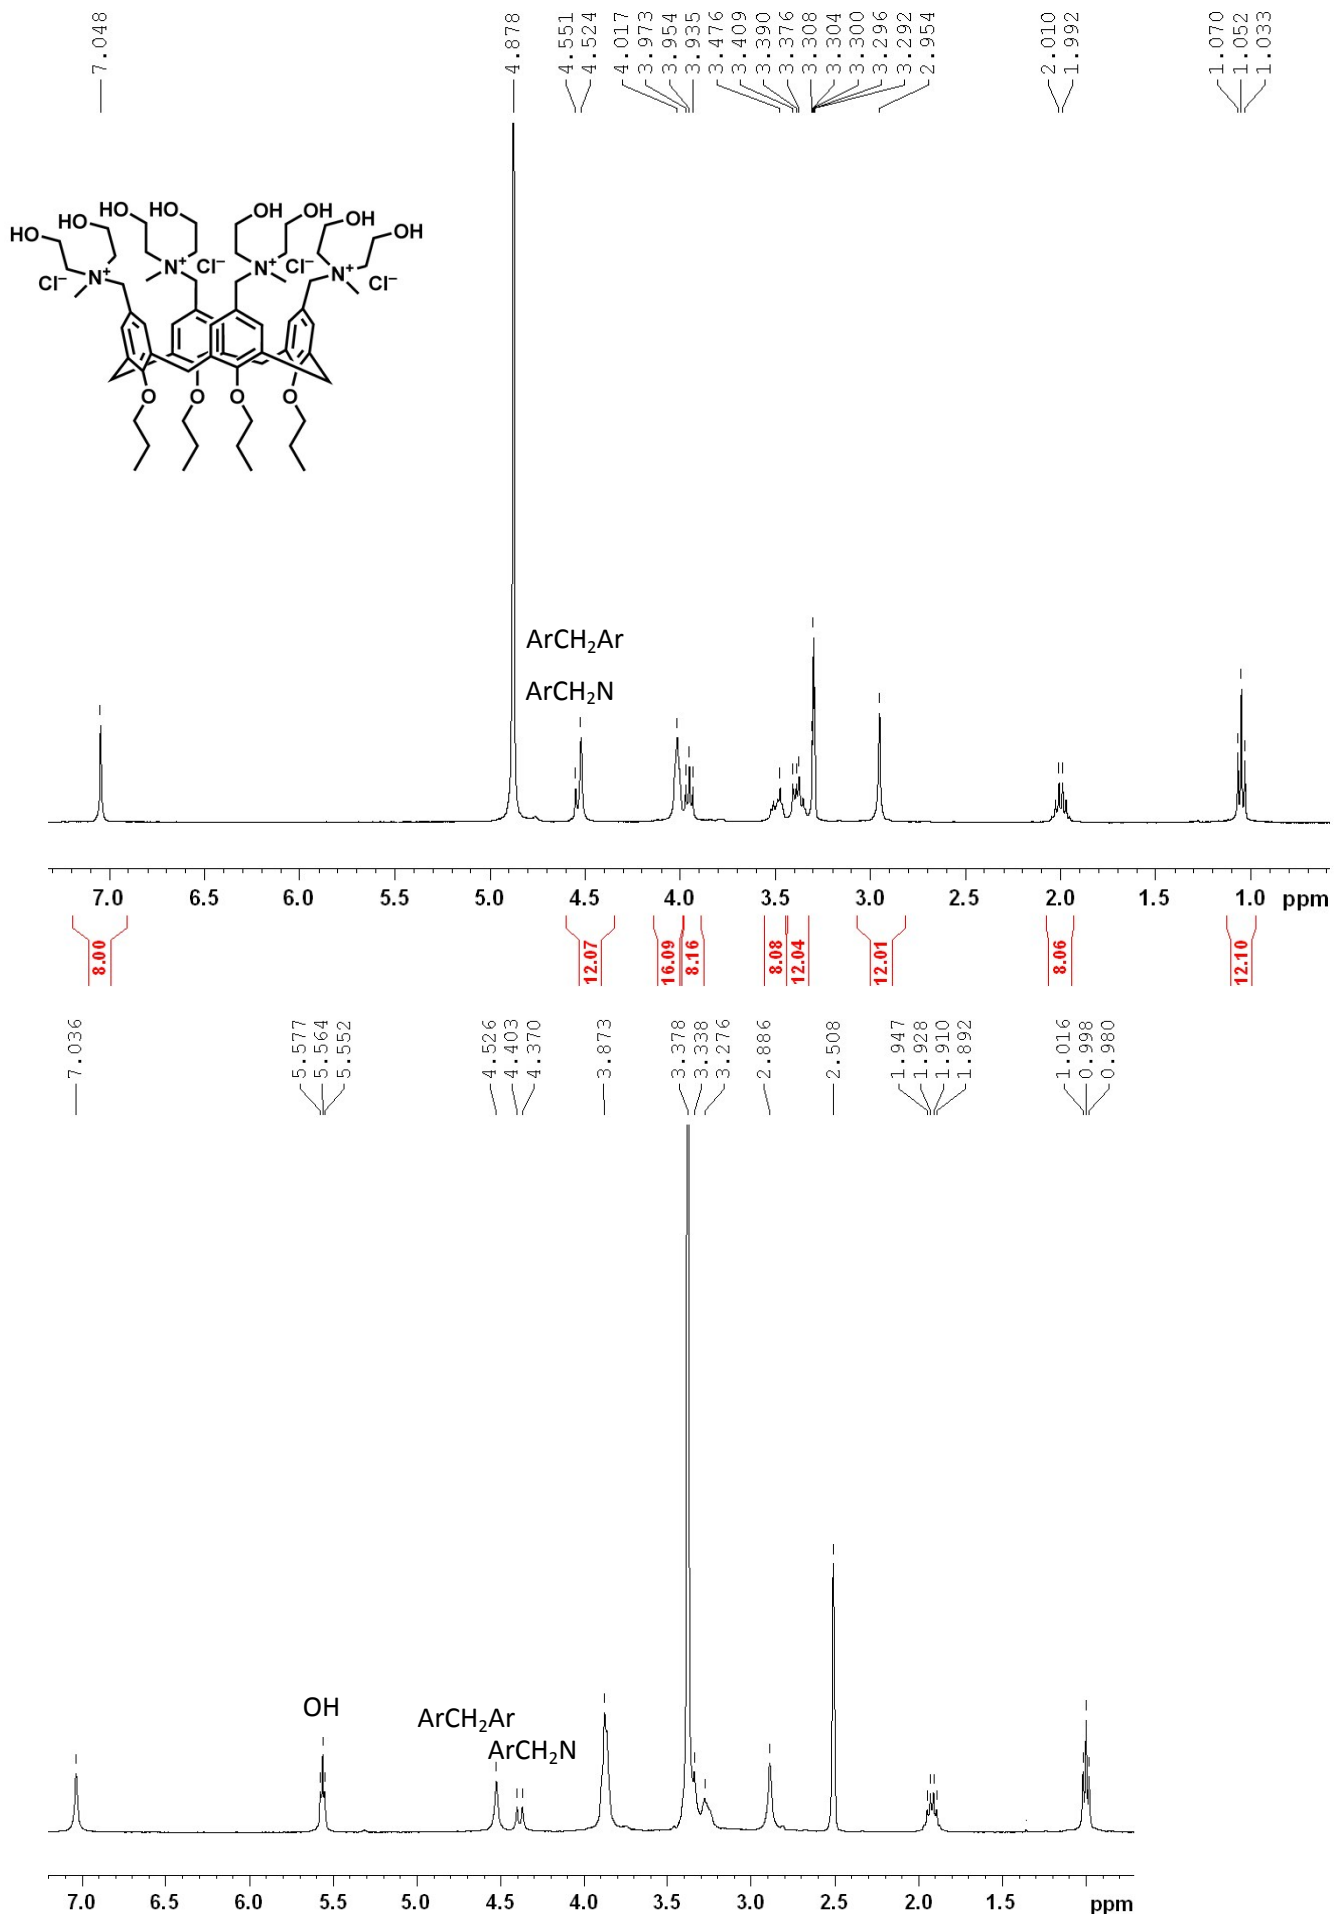

**Figure S1.** <sup>1</sup>H NMR spectra (297 K, 400.13 MHz) of compound **2** in MeOD (top), and in DMSO-d<sub>6</sub> (down).

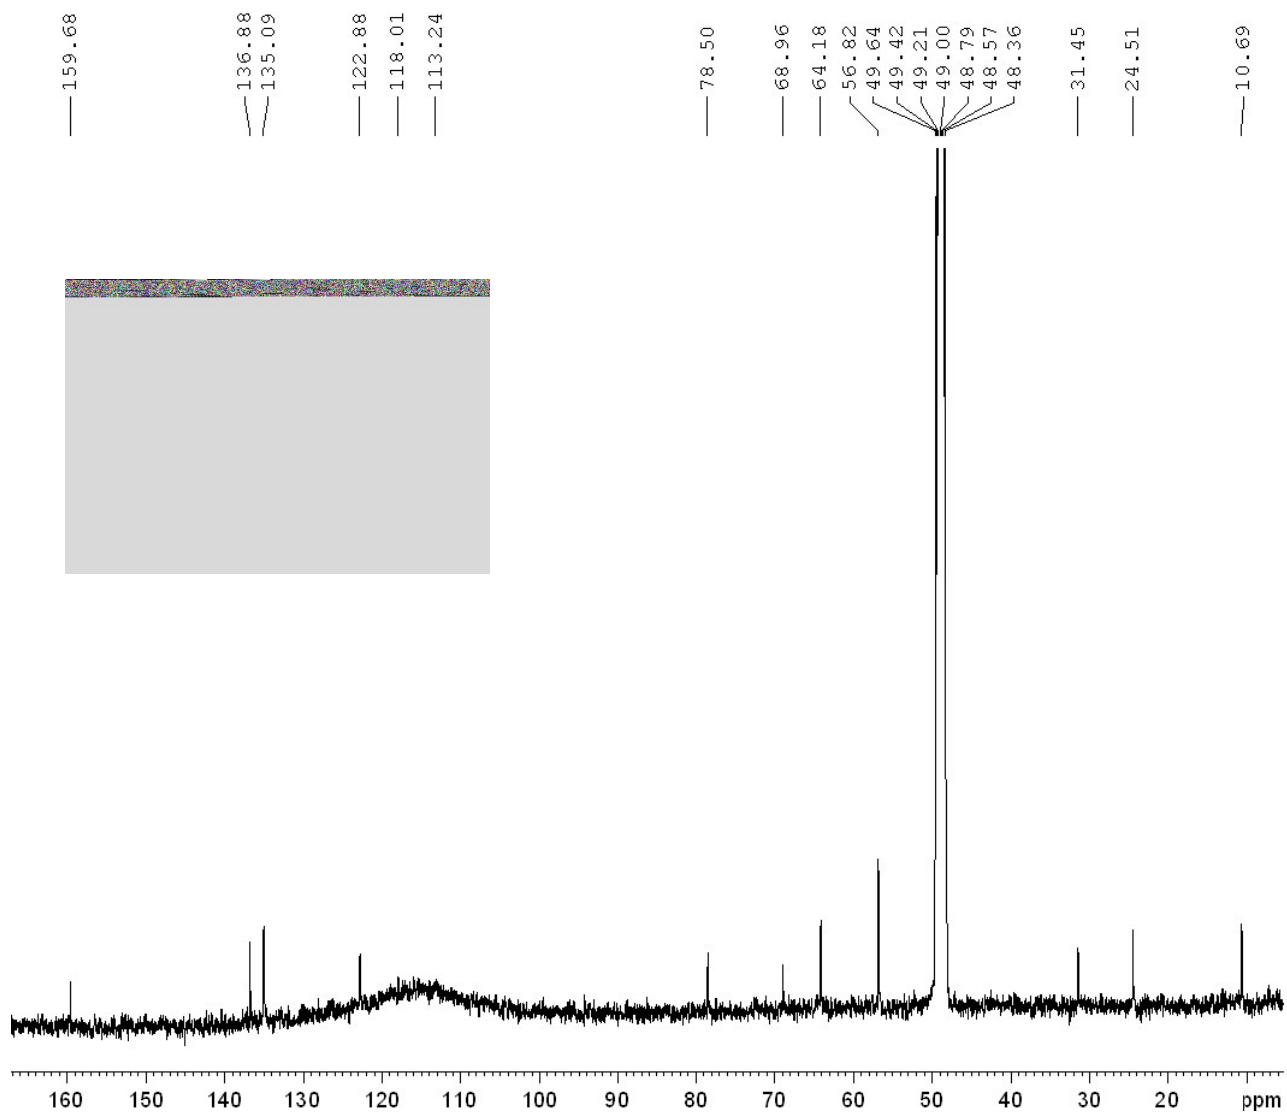

**Figure S2.**  $^{13}\text{C}$  NMR spectrum of compound **2** (MeOD, 297 K, 100.62 MHz).

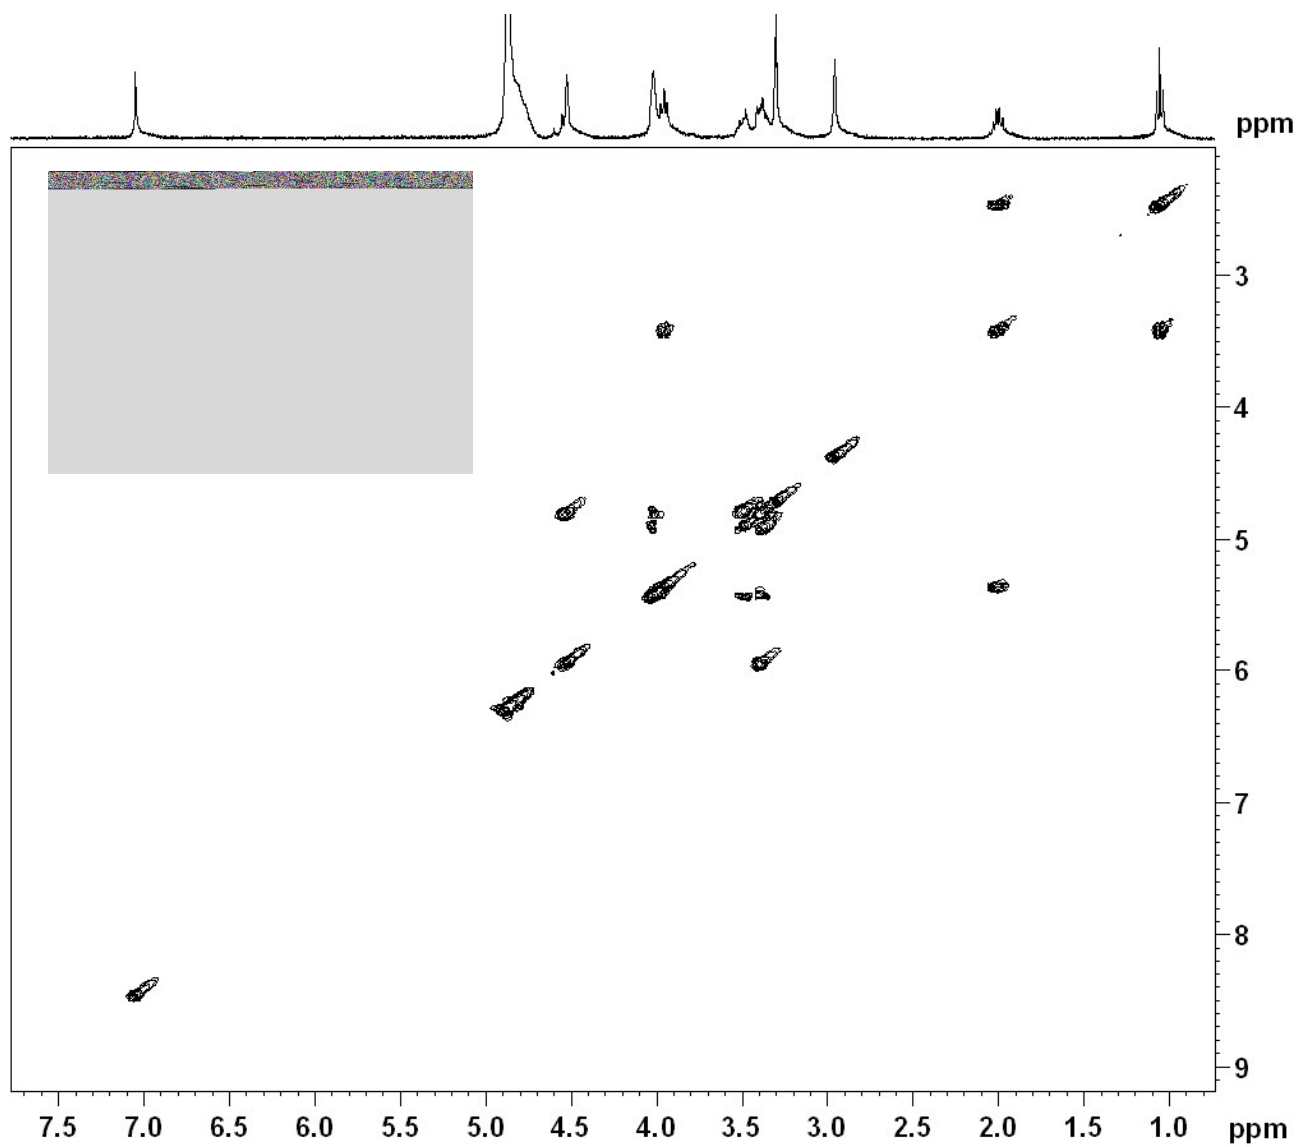

**Figure S3.** 2D COSY-NMR spectrum of compound **2** (MeOD, 297 K, 400.13 MHz).

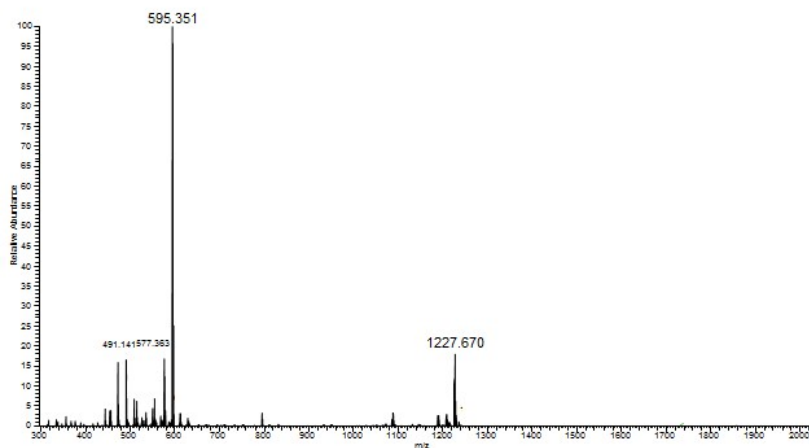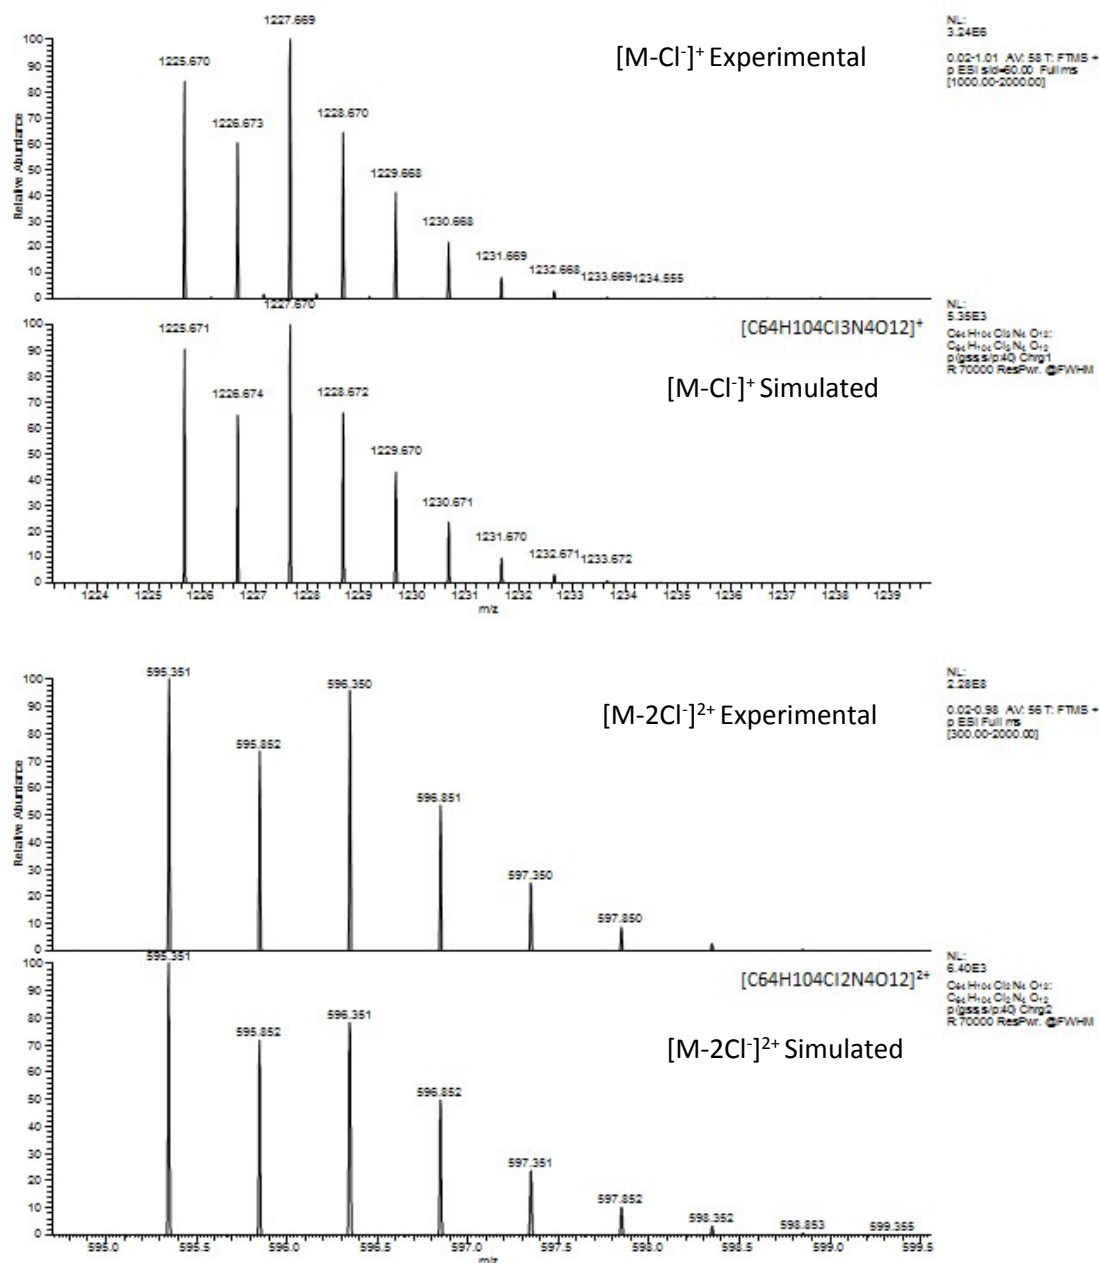

**Figure S4.** Regions of (HR) ESI-MS spectrum of compound **2**. The molecular species were detected as clusters of peaks because of the isotopic distribution of elements. The showed clusters correspond to the more abundant peaks in the full scan spectrum. The stoichiometry were assigned by comparing the simulated and experimental isotopic distribution spectra of each species observed.
